CORRECTION

# Correction: Seroreactivity against Specific L5P Antigen from *Mycobacterium avium* subsp. *paratuberculosis* in Children at Risk for T1D

Magdalena Niegowska, Novella Rapini, Frank Biet, Simona Piccinini, Sylvie Bay, Roberta Lidano, Maria Luisa Manca Bitti, Leonardo A. Sechi

There is an error in the first sentence of the MAP antigens section of the Methods: The sentence "Chemically synthesized L5P (DFNMLVLILFLA) was kindly provided by Frank Biet (INRA centre de Tours, Nouzilly, France)." should be replaced by "Synthetic L5P (C19H39CO-D-Phe-L-N-Me-Val-L-Ile-L-Phe-L-Ala-OMe) was prepared as previously described [14]."

The following information is missing from the Acknowledgements Section: The authors thank Christelle Ganneau for participating in the L5P synthesis.

## Reference

1. Niegowska M, Rapini N, Biet F, Piccinini S, Bay S, Lidano R, et al. (2016) Seroreactivity against Specific L5P Antigen from *Mycobacterium avium* subsp. *paratuberculosis* in Children at Risk for T1D. PLoS ONE 11(6): e0157962. doi:[10.1371/journal.pone.0157962](https://doi.org/10.1371/journal.pone.0157962) PMID: [27336739](https://pubmed.ncbi.nlm.nih.gov/27336739/)

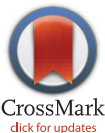

## OPEN ACCESS

**Citation:** Niegowska M, Rapini N, Biet F, Piccinini S, Bay S, Lidano R, et al. (2016) Correction: Seroreactivity against Specific L5P Antigen from *Mycobacterium avium* subsp. *paratuberculosis* in Children at Risk for T1D. PLoS ONE 11(8): e0161516. doi:[10.1371/journal.pone.0161516](https://doi.org/10.1371/journal.pone.0161516)

**Published:** August 16, 2016

**Copyright:** © 2016 Niegowska et al. This is an open access article distributed under the terms of the [Creative Commons Attribution License](https://creativecommons.org/licenses/by/4.0/), which permits unrestricted use, distribution, and reproduction in any medium, provided the original author and source are credited.
